# Supplementary material for: The Effect of Maternal Overweight/Obesity on Serum and Breastmilk Leptin, and Its Associations with Body Composition, Cardiometabolic Health Indices, and Maternal Diet: The BLOOM Study
Source: MDPI journal article supplement (doi:10.3390/metabo14040221), 2024-04-13
Supplement: s1 [file s1]

# The Effect of Maternal Overweight/Obesity on Serum and Breastmilk Leptin, and its Associations with Body Composition, Cardiometabolic Health Indices, and Maternal Diet: the BLOOM Study

Monika A. Zielinska-Pukos, Łukasz Kopiasz, and Jadwiga Hamulka

**Table S1.** Distribution of general variables of the participants among NW, OW and OB mothers.

| Variable                               | Study group<br>M ± SD / Me (25 – 75) / n (%) |                                    |                                     | p-Value             |
|----------------------------------------|----------------------------------------------|------------------------------------|-------------------------------------|---------------------|
|                                        | NW<br>n=20                                   | OW<br>n=12                         | OB<br>n=8                           |                     |
| Maternal age (years)                   | 31.9 ± 4.3                                   | 31.8 ± 3.4                         | 34.6 ± 3.3                          | 0.231 <sup>a</sup>  |
| Lactation duration (weeks)             | 15.7 ± 1.0                                   | 15.3 ± 1.3                         | 15.2 ± 1.4                          | 0.474 <sup>a</sup>  |
| Breastfeeding per day                  | 11.0 (10.0 – 13.0) <sup>a,b</sup>            | 13.5 (11.5 – 15.5) <sup>a</sup>    | 10.5 (8.5 – 11.5) <sup>b</sup>      | 0.044 <sup>c</sup>  |
| Primiparous (n (%))                    | 14 (70%)                                     | 8 (67%)                            | 4 (50%)                             | 0.599 <sup>d</sup>  |
| <b>Anthropometric parameters</b>       |                                              |                                    |                                     |                     |
| Pre-pregnancy BMI (kg/m <sup>2</sup> ) | 21.0 (19.9 – 22.6) <sup>a</sup>              | 28.2 (24.9 – 30.2) <sup>b</sup>    | 31.6 (30.9 – 31.7) <sup>b</sup>     | <0.001 <sup>c</sup> |
| Gestational weight gain (kg)           | 13.5 ± 4.1                                   | 14.1 ± 5.1                         | 12.1 ± 9.5                          | 0.958 <sup>c</sup>  |
| Current BMI (kg/m <sup>2</sup> )       | 21.4 (20.4 – 22.4) <sup>a</sup>              | 26.5 (25.9 – 28.5) <sup>b</sup>    | 33.6 (30.6 – 34.9) <sup>b</sup>     | <0.001 <sup>c</sup> |
| WC (cm)                                | 79.1 ± 5.3 <sup>a</sup>                      | 90.5 ± 6.4 <sup>b</sup>            | 105.4 ± 7.4 <sup>c</sup>            | <0.001 <sup>b</sup> |
| FFM (%)                                | 63.3 ± 4.3 <sup>a</sup>                      | 57.7 ± 3.8 <sup>b</sup>            | 52.6 ± 3.2 <sup>c</sup>             | <0.001 <sup>a</sup> |
| FM (%)                                 | 34.4 ± 4.5 <sup>a</sup>                      | 40.3 ± 4.0 <sup>b</sup>            | 45.9 ± 3.4 <sup>c</sup>             | <0.001 <sup>a</sup> |
| VAT (g)                                | 284.8 (117.5 – 420.5) <sup>a</sup>           | 642.0 (439.0 – 889.0) <sup>b</sup> | 756.5 (710.0 – 1314.0) <sup>b</sup> | <0.001 <sup>c</sup> |
| SAT (g)                                | 1053 (824 – 1244) <sup>a</sup>               | 1968 (1657 – 2155) <sup>b</sup>    | 2695 (2595 – 3482) <sup>b</sup>     | <0.001 <sup>c</sup> |
| <b>Lipid profile</b>                   |                                              |                                    |                                     |                     |
| CHOL (mg/dL)                           | 200.0 ± 29.5                                 | 186.6 ± 39.6                       | 212.7 ± 34.2                        | 0.240 <sup>a</sup>  |
| HDL-C (mg/dL)                          | 81.1 ± 13.6 <sup>a</sup>                     | 67.5 ± 13.6 <sup>b</sup>           | 68.3 ± 24.1 <sup>a,b</sup>          | 0.020 <sup>b</sup>  |
| LDL-C (mg/dL)                          | 107.3 ± 24.4                                 | 107.4 ± 39.5                       | 128.0 ± 37.7                        | 0.281 <sup>a</sup>  |
| TG (mg/dL)                             | 48.1 (44.4 – 60.9) <sup>a</sup>              | 57.0 (47.1 – 68.7) <sup>a,b</sup>  | 76.1 (59.7 – 84.3) <sup>b</sup>     | 0.033 <sup>c</sup>  |
| <b>Cardiometabolic indices</b>         |                                              |                                    |                                     |                     |
| AIP                                    | -0.22 (-0.27 – -0.15)                        | -0.08 (-0.39 – 0.08)               | 0.05 (-0.10 – 0.20)                 | 0.062 <sup>c</sup>  |
| CMI                                    | 0.13 (0.11 – 0.15) <sup>a</sup>              | 0.19 (0.16 – 0.30) <sup>a,b</sup>  | 0.35 (0.20 – 0.43) <sup>b</sup>     | 0.004 <sup>c</sup>  |
| LAP                                    | 13.6 ± 5.9 <sup>a</sup>                      | 21.5 ± 6.4 <sup>b</sup>            | 42.0 ± 20.5 <sup>c</sup>            | <0.001 <sup>b</sup> |
| VAI                                    | 0.52 (0.43 – 0.61) <sup>a</sup>              | 0.71 (0.58 – 1.02) <sup>a,b</sup>  | 1.14 (0.69 – 1.44) <sup>b</sup>     | 0.025 <sup>c</sup>  |
| <b>Dietary parameters</b>              |                                              |                                    |                                     |                     |
| Energy (kcal/d) <sup>a</sup>           | 2094 ± 326                                   | 2159 ± 286                         | 2289 ± 426                          | 0.436 <sup>b</sup>  |
| Fructose (g/d) <sup>b</sup>            | 9.5 ± 4.8                                    | 10.9 ± 4.1                         | 14.9 ± 11.0                         | 0.271 <sup>b</sup>  |
| PI-aMED                                | 5.0 (3.5 – 6.5)                              | 6.0 (4.5 – 6.0)                    | 4.5 (3.5 – 6.0)                     | 0.720 <sup>c</sup>  |
| <b>Leptin (pg/ml)</b>                  |                                              |                                    |                                     |                     |
| Serum                                  | 12406.5 ± 8819.0 <sup>a</sup>                | 17533.0 ± 7939.7 <sup>a</sup>      | 55445.4 ± 29332.5 <sup>b</sup>      | <0.001 <sup>b</sup> |
| Serum fold change                      | -                                            | ↑1.4x vs. NW                       | ↑3.2x vs. OW,<br>↑4.5x vs. NW       |                     |
| Breastmilk                             | 108.9 ± 77.8 <sup>a</sup>                    | 110.9 ± 62.5 <sup>a</sup>          | 685.1 ± 457.9 <sup>b</sup>          | <0.001 <sup>b</sup> |
| Breastmilk fold change                 | -                                            | -                                  | ↑6.2x vs. NW&OW                     |                     |

AIP, atherogenic index of plasma; BMI, body mass index; CHOL, total cholesterol; CMI, cardiometabolic index; FFM, fat-free mass; FM, fat mass; HDL-C, HDL cholesterol; LAP, lipid accumulation product; LDL-C, LDL cholesterol; M, mean; Me, median; NW, normal weight; OB, obese; OW, overweight; PI-aMED, Polish-adapted Mediterranean Diet; SAT, subcutaneous adipose tissue; SD, standard deviation; TG, triglycerides; WC, waist circumference; VAI, visceral adiposity index; VAT, visceral adipose tissue. <sup>a</sup> result of the ANOVA test conducted on original data (after checking the variance heterogeneity using the Levene test) with the Tukey; <sup>b</sup> result of the ANOVA test conducted on log-transformed data (after checking the variance heterogeneity using the Levene test); <sup>c</sup> results of ANOVA Kruskal-Wallis test; <sup>d</sup> results of Chi2 test. The different lower case letters indicate significantly different values.

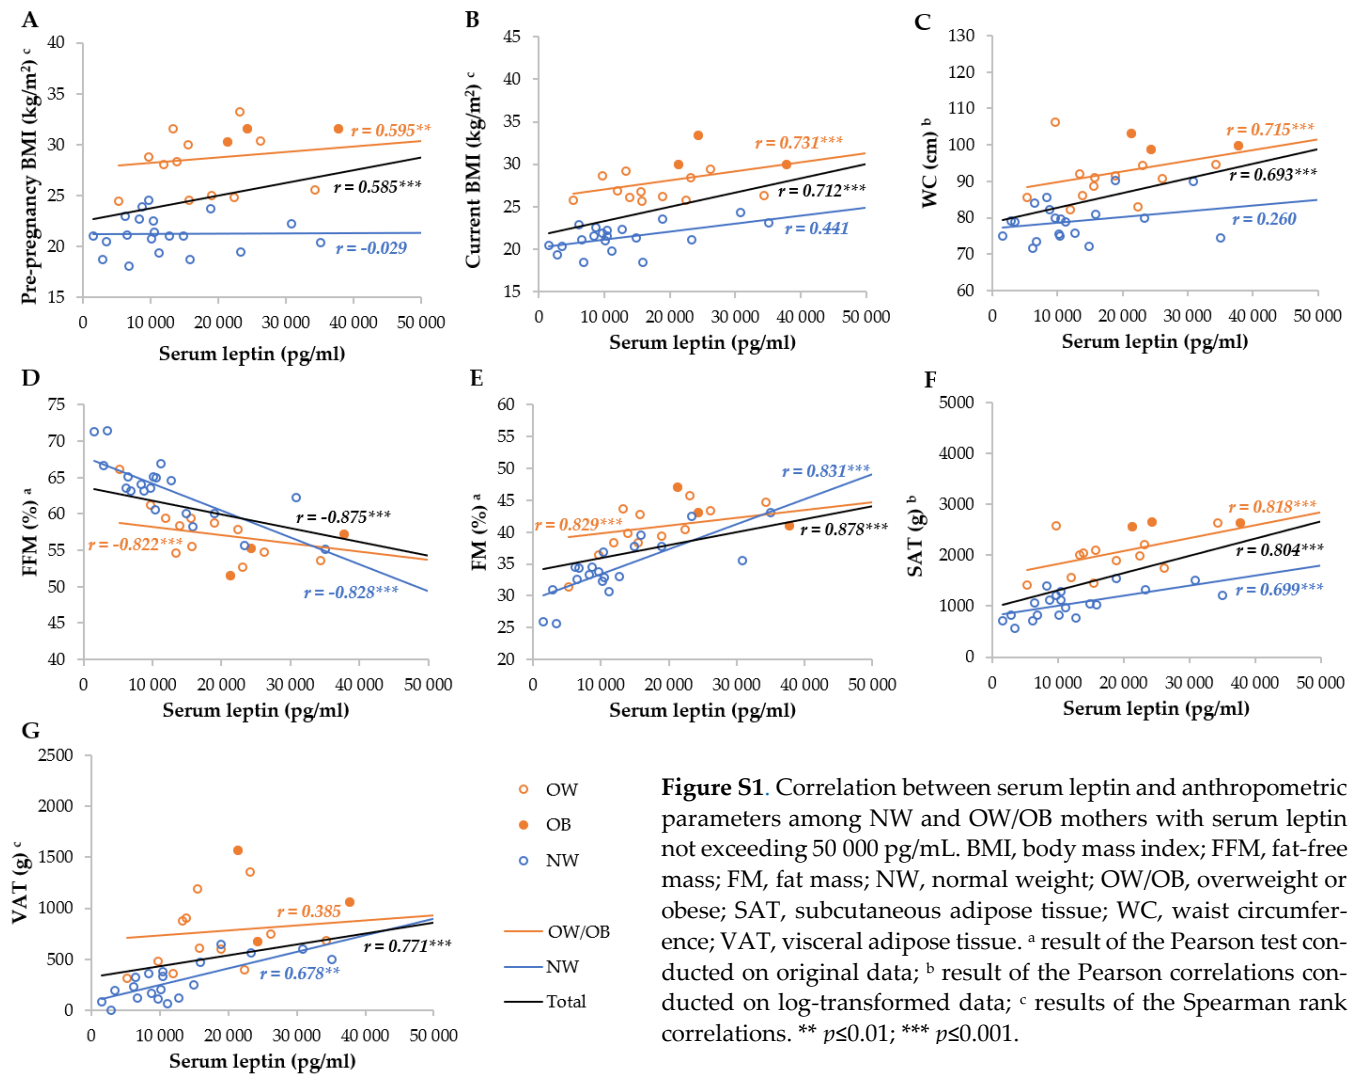

(A) Correlation between serum leptin and pre-pregnancy BMI, (B) Correlation between serum leptin and current BMI, (C) Correlation between serum leptin and WC, (D) Correlation between serum leptin and FFM, (E) Correlation between serum leptin and FM, (F) Correlation between serum leptin and SAT, (G) Correlation between serum leptin and VAT.

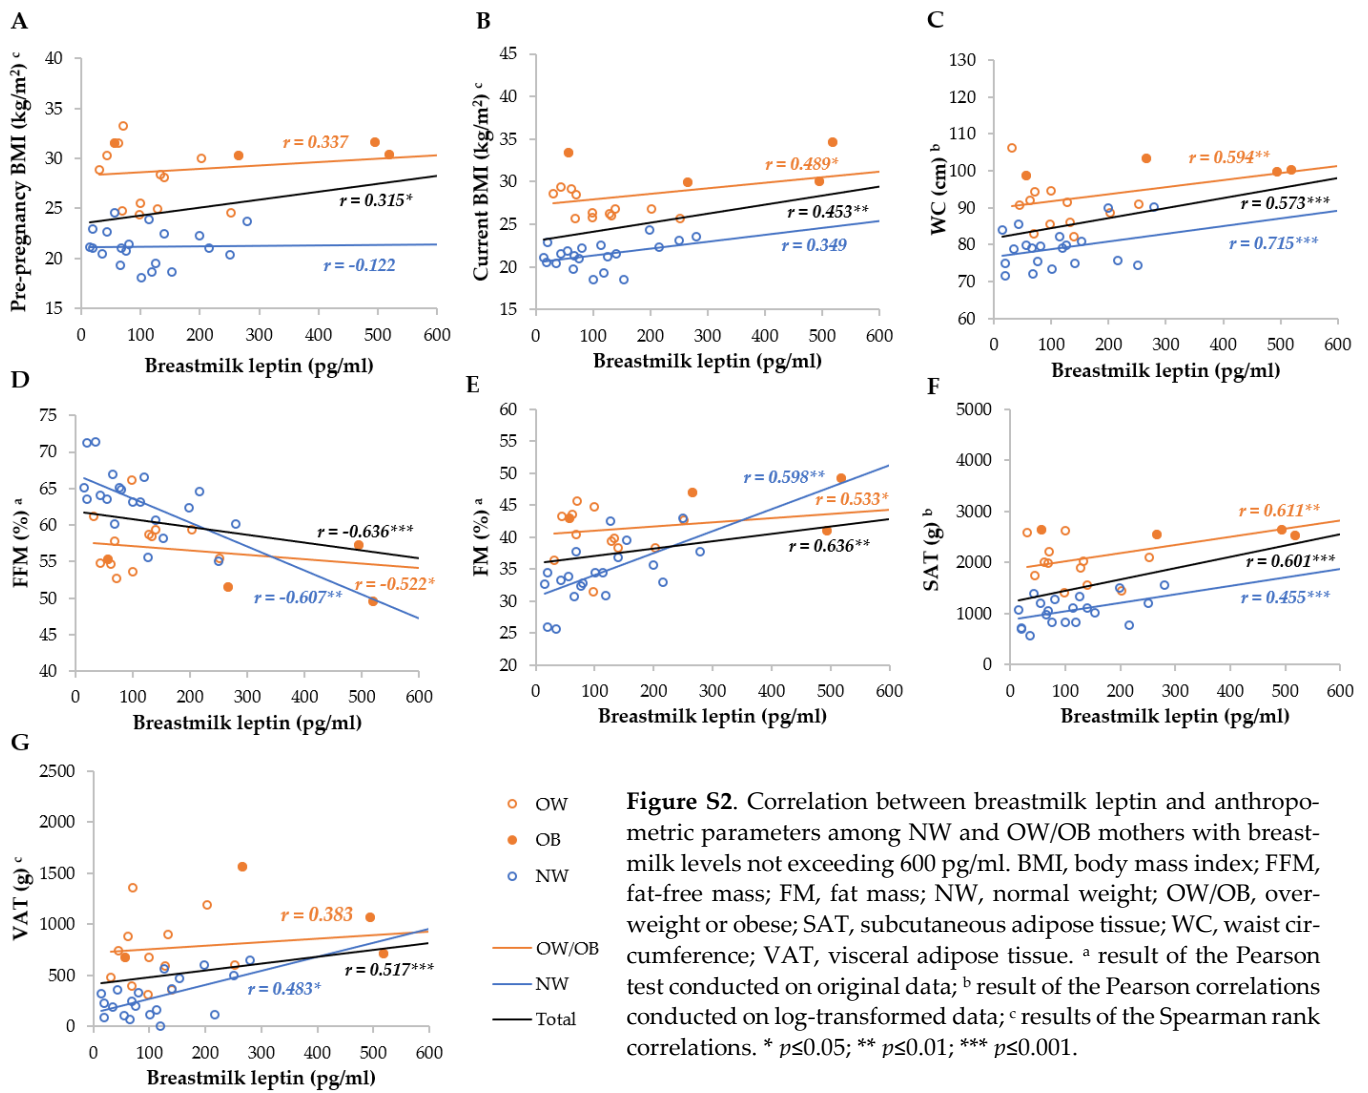

(A) Correlation between serum leptin and pre-pregnancy BMI, (B) Correlation between serum leptin and current BMI, (C) Correlation between serum leptin and WC, (D) Correlation between serum leptin and FFM, (E) Correlation between serum leptin and FM, (F) Correlation between serum leptin and SAT, (G) Correlation between serum leptin and VAT.
